# Supplementary material
Source: publisher site journal article supplement (http://degruyter.com/publication/journal_key/PAC/downloadAsset/PAC_PAC_PAC_GCS%20Special%20Issue.pdf)
Supplement: Supplementary file 1 [file PAC_PAC_PAC_GCS%20Special%20Issue.pdf]

# SPECIAL ISSUE 2023-2024, PURE AND APPLIED CHEMISTRY: ACTIVITIES AND ACTIONS TOWARDS A SUSTAINABLE FUTURE

## GUEST EDITORS

---

**Dr. João Borges**, Senior Researcher at CICECO – Aveiro Institute of Materials, Department of Chemistry, University of Aveiro, Portugal; Task Group Chair of the IYCN/IUPAC Joint Project *Global Conversation on Sustainability*

**E-mail:** [joaoborges@ua.pt](mailto:joaoborges@ua.pt)

**Dr. Juliana Vidal**, Higher Education Program Manager at Beyond Benign, Canada; Task Group Member of the IYCN/IUPAC Joint Project *Global Conversation on Sustainability*

**E-mail:** [juliana\\_vidal@beyondbenign.org](mailto:juliana_vidal@beyondbenign.org)

## DESCRIPTION

---

‘**Sustainable action begins with a conversation**’, and the role of chemists in achieving a sustainable future is vital. The Global Conversation on Sustainability (GCS; <https://www.gcs-day.org>) is a joint project launched in 2022 by the International Younger Chemists Network (IYCN) and the International Union of Pure and Applied Chemistry (IUPAC). This project is a starting point for implementing, communicating, collaborating, and adopting more sustainable practices and solutions globally for the benefit of everyone, striving for a sustainable future.

In this special issue of *Pure and Applied Chemistry*, we will feature diverse formats of GCS events organized by individuals, organizations, and institutions worldwide next September 25th, 2023 (GCS Day). Contributions towards addressing the United Nations Sustainable Development Goals (UN SDGs) and advancing sustainability in regional, national, or global environments and communities will also be showcased. Moreover, feature, opinion, and perspective articles by the global chemistry community on the topic are welcome.

We hope the pieces highlighted in this special issue will empower and inspire the community to join ongoing and begin their own local, national, and international conversations, thus contributing in their own way. Every action, big or small, is meaningful and an important step towards achieving a diverse, sustainable, and just future for the next generations.

## SUBMIT YOUR ARTICLE

---

Enter your submission via the online system and choose “**Special Issue: GCS**”. All manuscripts will undergo the standard peer-review process (single-blind, with at least two independent reviewers). Submission of a manuscript implies that the work described has not been published before and is not under consideration for publication anywhere else.

The deadline for article submissions is **April 30th, 2024**, and individual papers will be reviewed and published online continuously. If interested in contributing, please e-mail an article outline to: [contact@gcs-day.org](mailto:contact@gcs-day.org).
